# Supplementary material for: A novel interoceptive subfornical organ to infralimbic cortex mechanism relays airway inflammation effects on fear extinction
Source: Research Square preprint supplement (doi:10.21203/rs.3.rs-8320765/v1), 2026-01-12
Supplement: Supplementary file 1 [file 3c24db8112a508c5c4ae5c87.docx]

**Fig S1: Flow cytometry gating strategy of lung tissue from HDM+ IgG (mild) and HDM+ αC5aR1 (severe) AI mice**(A) Gating strategy to examine IL-17A and IL-13 production by CD4+ T cells or IL-17A production by ILCs. IL-17A (IL-13) expressing CD4+ T cells were identified as CD90.2+,𝛾𝛿TCR-,CD3+TCR𝛽+, CD4+, CD44+IL17A+(IL-13+) live lymphocytes. IL-17A expressing ILCs were identified CD90.2+,𝛾𝛿TCR-,CD3-TCR𝛽-, CD44+IL17A+ live lymphocytes. A representative plot from each treatment group and FMO is shown in panel (B)


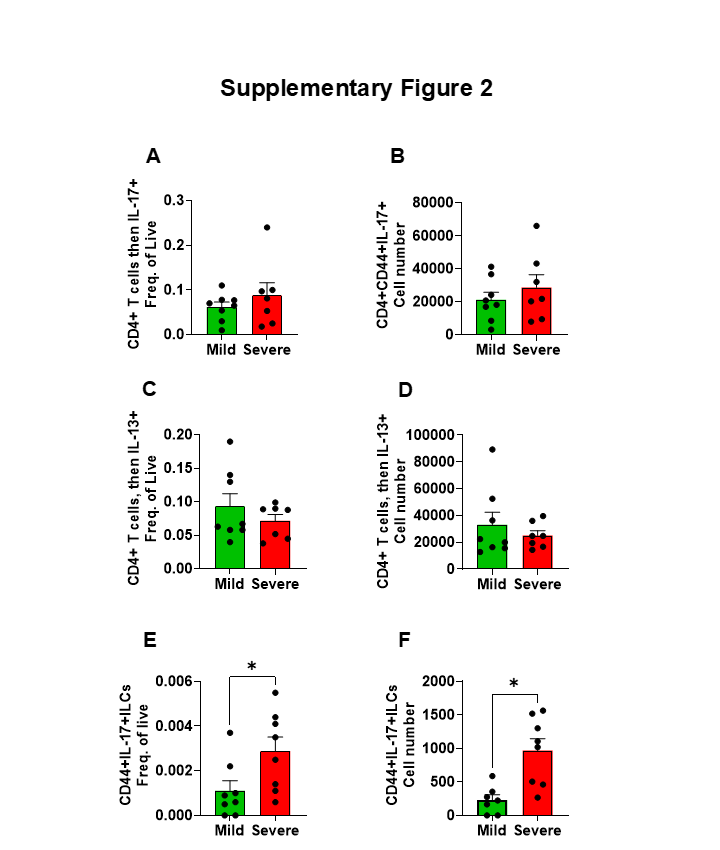


**Fig S2: Flow cytometry analysis of lung tissue from HDM+IgG (mild) and HDM+ αC5aR1 (severe) AI mice** The frequency and number of IL-17A (A-B) and IL-13 (C-D) producing CD4+ T cells and IL-17A producing ILCs (E-F) in the lungs of HDM-treated mice that received either IgG antibody (mild) or anti-CD5aR1 antibody (severe). IL-17A (IL-13) expressing CD4+ T cells were identified as CD90.2+,𝛾𝛿TCR ,CD3+TCR𝛽+,CD4+,CD44+IL17A+(IL-13+) live lymphocytes. IL-17A expressing ILCs were identified CD90.2+,𝛾𝛿TCR-,CD3-TCR𝛽-,CD44+IL17A+ live lymphocytes. Data are shown as a frequency of total live cells in each sample as well as the number of cells per lung sample. Significantly higher frequency of total live IL-17A producing lung ILCs (panel E) (unpaired t test t=2.319, df=14, p=0.036) and total number of IL-17A producing lung ILCs (panel F) (unpaired t test t=3.627, df=13, p=0.003) was observed. Mean ±SEM. * p= , students *t*-test, N=8 mice per group.


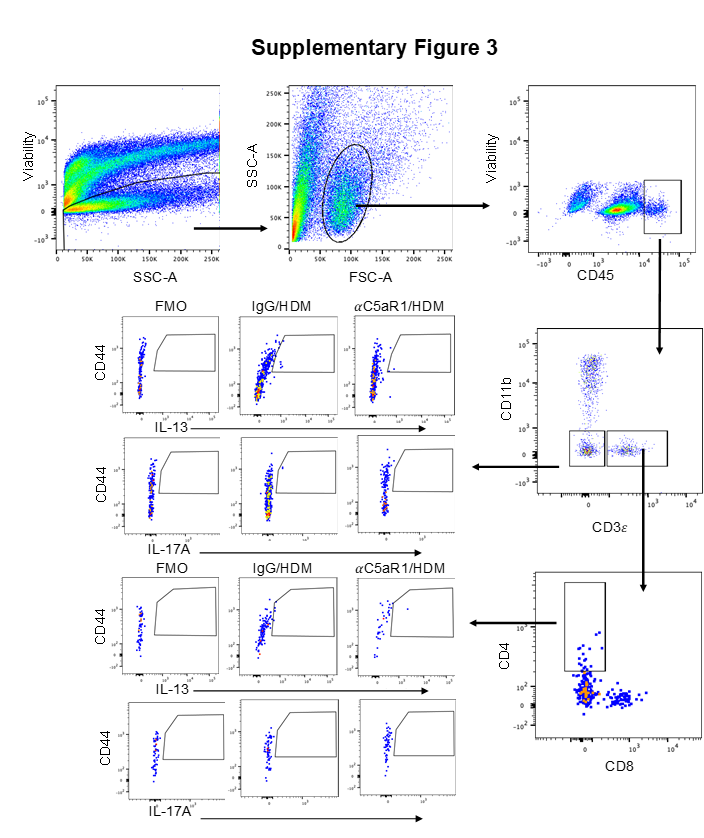


**Fig S3: Flow cytometry gating strategy of brain tissue from HDM+ IgG (mild) and HDM+ αC5aR1 (severe) AI mice**

Gating strategy to examine cytokine production by infiltrating immune cells in the brain.

Infiltrating immune cells were identified as CD45Hi. IL-13- or IL-17A-producing CD4+ T cells were defined as CD3+CD11b-CD44+ while other infiltrating immune cells were identified at CD3-CD11b-CD44+. A representative plot from each treatment group and FMO is shown.


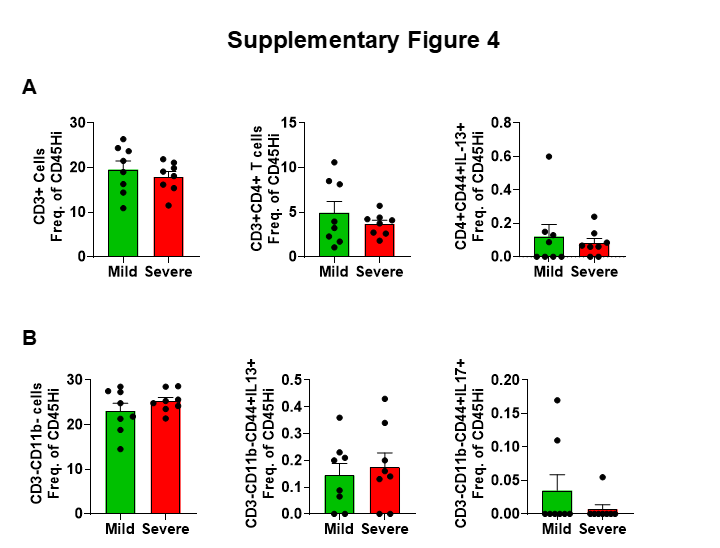


**Fig S4: Flow cytometry analysis of brain tissue from HDM+ IgG (mild) and HDM+ αC5aR1 (severe) AI mice**

The frequency of infiltrating CD3+CD11b-(A.) and CD3-CD11b-(B.) cells in the brains of HDM-treated mice that received either IgG control antibody or anti-C5aR1 antibody.

IL-13-producing CD4+ T cells were defined as CD45HiCD3+CD11b-CD4+CD44+ and IL-13- and IL-17A-producing immune cells were defined at CD45HiCD3-CD11b-CD44+. No differences were observed between treatment groups (p>0.05). Data are shown as a frequency of CD45Hi cells in each sample, ean ± sem. N= 8 mice per group


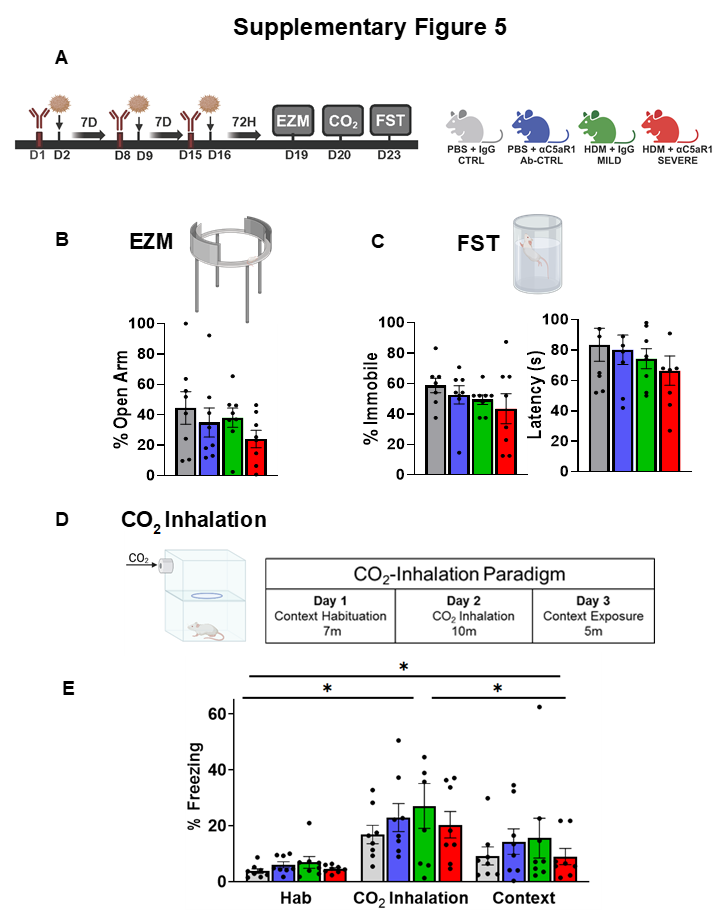


**Figure S5: Defensive behaviors to exteroceptive (elevated zero maze, EZM, forced swim test, FST) or interoceptive (CO2 inhalation) threat exposures are not altered in severe AI mice**

(A) Schematic showing experimental layout and timeline. Mice treatment groups that underwent behavioral testing are shown.

(B) Exposure to the EZM showed no significant group differences (open arm time, F3,28 = 0.9966; p= 0.4089)

(C) No significant group differences were observed in the FST (% immobility, F3,28 = 0.9988; p= 0.4079; latency to immobility, F3,28 = 0.6089; p = 0.6417)

(D) Dual chamber CO2-inhalation setup and schematic of the 3-day CO2 inhalation- contextual fear paradigm

(E) Fear response (% freezing) to interoceptive threat, CO2 inhalation and CO2-context conditioned fear (CF) revealed increased freezing to CO2 inhalation and 24h post CO2 context exposure. A 2-way ANOVA revealed a significant effect of exposure day (F 1.719, 48.13 =30.13, p<0.0001), post hoc analysis revealed significantly higher freezing on CO2 and context exposure days relative to habituation [Hab v CO2 (p < 0.0001), Hab v CF (p = 0.0044) and CO2 vs CF (p < 0.001)]. However, no significant effect of treatment group was observed (F 3,28 = 0.725, p=0.545). All data are mean ± sem, N=8 mice per group

**Figure S6: Post behavior ΔFosB cell counts within fear regulatory brain regions**

(A) Brain atlas representation of brain areas for ΔFosB quantification: prelimbic cortex (PL), basolateral amygdala (BLA), central nucleus of amygdala (CeA), hippocampal dentate gyrus (DG), and bed nucleus of stria terminalis (BNST)

(B) No significant differences were observed in the PL (t11 = 0.33; p = 0.330), BLA (t11 = 1.85; p = 0.091), CeA (t11 = 1.74; p = 0.110), DG (t11 = 0.543; p = 0.597) or BNST (t11 = 0.435; p = 0.671).

All data are Mean ± sem, N= 7 (mild), 6 (severe)

**Figure S7: Molecular profile of two transcriptomically distinct microglial populations in the SFO.**

**A**. Dotplot of cell-type-specific and canonical microglial markers in the two SFO microglial populations. Dot size is proportional to % of cells with transcript count >0, color scale represents z-scored average gene expression (*n* =m7,950 SFO cells).

**B**. Dotplot of cell-type-specific and canonical microglial markers in SFO cell classes. Data in **A** and **B** reanalyzed and plotted from a previous study (Pool et al, 2020) [56].

**Figure S8: RNAscope in-situ hybridization for cellular expression of *Il17ra* in the SFO and PFC**

Representative 20x and 40x images from RNAscope *in-situ* hybridization on SFO slices using probes for *Il17ra* and GFAP (A) and immunohistochemistry with neuronal marker HuC/D (B). Arrows in (A) show scattered co-localization of *Il17ra*+ve puncta (magenta) with GFAP+ve puncta (yellow), DAPI stained cells shown in blue. No co-localization of *Il17ra*+ve puncta (magenta) was evident with HuC/D+ve neurons (green) (B).

Graph (C) and Images (D-F) are from *Il17ra* in situ-hybridization performed in PFC slices.

Representative 20x images using *Il17ra* probe with neuronal marker HuC/D (D) and IBA1 (E) co-localized with *Il17ra* puncta. Arrows in (D, E) show scattered co-localization of *Il17ra*+ve puncta (magenta) with HuC/D+ve cells (green) and IBA1+ve puncta (yellow) (E). No co-localization was observed with GFAP+ve puncta (yellow) (F). Graph (C) shows percent expression of *Il17ra* with IBA1 (43.8%), HuC/D (20.3%) and GFAP (not detected) within the prefrontal cortex.
